# Supplementary material
Source: Springer Nature journal article supplement (http://link.springer.com/content/esm/art:10.1186/1471-2334-14-183/file/MediaObjects/12879_2013_3094_MOESM2_ESM.pdf)
Supplement: MOESM2 [file 12879_2013_3094_MOESM2_ESM.pdf]

## Institutional Review Boards/Ethics Committees by Country – Study 0019

| Country   | Institutional Review Board/Ethics Committee                                                                                                                                                                                                                                                                                                                                                                                                                                                                                                                                                                                                                                                                                                                                                                                                                                                                                                                                                                                                                                                                                                                                                                                                                                                                                                                                                                                                                                                                                                                                                                                                                                                                                                                                                                                                                                                                                            |
|-----------|----------------------------------------------------------------------------------------------------------------------------------------------------------------------------------------------------------------------------------------------------------------------------------------------------------------------------------------------------------------------------------------------------------------------------------------------------------------------------------------------------------------------------------------------------------------------------------------------------------------------------------------------------------------------------------------------------------------------------------------------------------------------------------------------------------------------------------------------------------------------------------------------------------------------------------------------------------------------------------------------------------------------------------------------------------------------------------------------------------------------------------------------------------------------------------------------------------------------------------------------------------------------------------------------------------------------------------------------------------------------------------------------------------------------------------------------------------------------------------------------------------------------------------------------------------------------------------------------------------------------------------------------------------------------------------------------------------------------------------------------------------------------------------------------------------------------------------------------------------------------------------------------------------------------------------------|
| Argentina | <p>Comite de Etica en Investigacion Clinica, “Dr. Virgilio Foglia”, Tucuman 335-7° “D”, (C1049AAG) Buenos Aires</p> <p>Comite de Docencia e Investigacion, Hospital General de Agudos, Dr. Cosme Argerich, Av. Almirante Brown 240, C1155ADP Buenos Aires</p> <p>Comite de Bioetica, Hospital General de Agudos, Dr. Cosme Argerich, Av. Almirante Brown 240, C1155ADP Buenos Aires</p> <p>Comite Hospitalario de Bioetica, Hospital F.J. Muniz, Uspallata 2272, (C1282AEN) Buenos Aires</p> <p>Comite de Docencia e Investigacion, Sanatorio San Jose, Sanchez de Bustamante 1674, (C1425DHU), Buenos Aires</p> <p>Departamento de Docencia e Investigacion, Hospital Aleman, Av. Pueyrredon 1640, (1118), Ciudad de Buenos Aires</p> <p>Comité de Bioetica Medica, Av. Pueyrredon 1640, (1118) Buenos Aires</p> <p>Comite Institucional de Etica de, Investigacion en Salud del Sanatorio Allende, Hipolito Yrigoyen 384, (5000) Cordoba</p> <p>Comite de Etica del Hospital de Clinicas, Av. Cordoba 2351, (C1120AAR) Buenos Aires</p> <p>Direccion de Docencia e Investigacion, Av. Cordoba 2351, (C1120AAR) Buenos Aires</p> <p>Hospital Privado Centro Medico de Cordoba, Departamento de Docencia e Investigacion, Comite De Revision Interna, Av. Naciones Unidas 346, Parque Velez Sarfield (5016), Cordoba</p> <p>Fundacion Medica de Mar del Plata, Departamento de Docencia e Investigacion, Cordoba 4545, (7600) Mar del Plata, Buenos Aires</p> <p>Comite de Etica del Instituto A. Roffo, Av. San Martin 5481, (C1417DTB) Buenos Aires</p> <p>Comite de Docencia e Investigacion, Instituto A. Roffo, Av. San Martin 5481, (C1417DTB) Ciudad de Buenos Aires</p> <p>Comite de Etica, Hospital General de Agudos Carlos G. Durand, Av. Diaz Velez 5044, (C1405DCR) Buenos Aires</p> <p>Comité de Dodencia e Investigacion, Hospital General de Agudos Carlos G. Durand, Av. Diaz Velez 5044, (C1405DCR) Buenos Aires</p> |

| Country   | Institutional Review Board/Ethics Committee                                                                                                                                                                                                                                                                                                                                                                                                                                                                                                                                                                                                                                                                                                                                                                                                                                                                                                                                                                                                                                                                                                                                         |
|-----------|-------------------------------------------------------------------------------------------------------------------------------------------------------------------------------------------------------------------------------------------------------------------------------------------------------------------------------------------------------------------------------------------------------------------------------------------------------------------------------------------------------------------------------------------------------------------------------------------------------------------------------------------------------------------------------------------------------------------------------------------------------------------------------------------------------------------------------------------------------------------------------------------------------------------------------------------------------------------------------------------------------------------------------------------------------------------------------------------------------------------------------------------------------------------------------------|
| Australia | <p>Melbourne Health Human Research Ethics Committee, Charles Connibere Building, The Royal Melbourne Hospital, Flemington Road, Parkville, Victoria</p> <p>Eastern Health Research and Ethics Committee, Level 2, Clive Ward Centre, 16 Arnold Street, Box Hill, Victoria</p> <p>Human Research Ethics Committee, Level 4 The Queen Elizabeth Hospital, Department of Intensive Care Medicine, 28 Woodville Road, Woodville, South Australia</p> <p>Sydney West Area Health Service (Westmead Campus), Human Research Ethics Committee, Research Office, Clinical Sciences, Westmead Hospital Campus, Westmead, New South Wales</p> <p>Bendigo Health Human Research Ethics Committee, PO Box 126, Bendigo, Victoria</p> <p>Human Research Ethics Committee, Research Office, Level 4, Vindin House, Royal North Shore Hospital, Pacific Hwy, St. Leonards, New South Wales</p> <p>ACT Health and Community Care, Human Research Ethics Committee, 11 Moore Street, Canberra, ACT</p> <p>Southern Health Human Research Ethics Committee, 246 Clayton Road, Clayton Victoria</p> <p>Human Research Ethics Committee, Level 6, de Lacy Bldg., Victoria Street, Darlinghurst, NSW</p> |
| Brazil    | <p>Comite de Etica em Pesquisa, Instituto de Assistencia Medica ao Servidor Publico Estadual, Av. Ibirapuera, 981 - 6° andar – sl. 605, Sao Paulo</p> <p>Comite de Etica em Pesquisa – CEP/ISCMPA, Rua Prof. Annes Dias, 285, Porto Alegre – Rio Grande do Sul</p> <p>Comite de Etica em Pesquisa do, Hospital Professor Edmundo Vaconcelos, Rua Borges Lagoa, 1450, CEP: 04038-905, Sao Paulo</p> <p>Comite de Etica em Pesquisa do Hospital Guilherme Alvaro, Rua Oswaldo Cruz, 197 – Boqueirao, Santos, SP – CEP: 11045-904</p> <p>Comite de Etica em Pesquisa da Faculdade de Medicina do ABC, Av. Principe de Gales, 821, Santo Andre, SP – CEP: 09060-650</p> <p>Comite de Etica em Pesquisa do Instituto Dante Pazzanese de Cardiologia, Av. Dr. Dante Pazzanese, 500., Ibirapuera, Sao Paulo</p>                                                                                                                                                                                                                                                                                                                                                                            |

| Country  | Institutional Review Board/Ethics Committee                                                                                                                                                                                                                                                                                                                                                                                                                                                                                                                                                                                                                                                                                                                                                                                                                                                                                                                                                                                                                                                                                                                                                                 |
|----------|-------------------------------------------------------------------------------------------------------------------------------------------------------------------------------------------------------------------------------------------------------------------------------------------------------------------------------------------------------------------------------------------------------------------------------------------------------------------------------------------------------------------------------------------------------------------------------------------------------------------------------------------------------------------------------------------------------------------------------------------------------------------------------------------------------------------------------------------------------------------------------------------------------------------------------------------------------------------------------------------------------------------------------------------------------------------------------------------------------------------------------------------------------------------------------------------------------------|
| Bulgaria | <p>Local Ethics Committee, Multifunctional Hospital for Active Treatment and Emergency Medicine (MHATEM) “N.I. Pirogov”, 21, Totleben Blvd, 1606 Sofia</p> <p>Local Ethics Committee, University Multifunctional Hospital for Active Treatment “Sv. Anna”, Clinic of Anesthesiology and Intensive Care, 1 “Dimitar Mollov” Str., 1709 Sofia</p> <p>Local Ethics Committee, Multifunctional Hospital for Active Treatment “Prof Kirkovich” 0, “Stoletov” Blvd, 6003 Stara Zagora</p> <p>Local Ethics Committee, University Multifunctional Hospital for Active Treatment, 11 “Armeiska” Str. 6003 Stara Zagora</p> <p>Local Ethics Committee, Regional Hospital for Pulmonary Diseases, First Pulmonology Department, 1 “Aleia Lilia” Str., 7002 Rousse</p> <p>Local Ethics Committee, University Multifunctional Hospital for Active Treatment (UMHAT) “Sv. Marina”, 1 “Hristo Smirnenski” Str., 9010 Varna</p> <p>Local Ethics Committee, University Multifunctional Hospital for Active Treatment “Sv. Georgi”, 15A “Vassil Aprilov” Str., 4000 Plovdiv</p> <p>Local Ethics Committee, Specialized Hospital for Active Treatment of Pneumo-Phtysiatic Diseases, 64 “General Gurko” Str., 8000 Bourgas</p> |
| Canada   | <p>Maisonneuve Rosemont Hospital Ethic Board, 5415 boul de l'Assomption, Montreal, Quebec</p> <p>University of Calgary, Conjoint Health Research Ethics Board, Office of Medical Bioethics, Heritage Medical Research Bldg, Room 93, 3330 Hospital Dr. N.W., Calgary, Alberta</p> <p>Fraser Health Research Ethics Board, #300-10334 152A Street, Surrey, BC</p> <p>University of British Columbia Clinical Research Ethics Board, Research Pavillion, Room 210-828 West 10th Avenue, Vancouver, British Columbia</p> <p>Queen’s University Health Services &amp; Affiliated Teaching Hospitals, Human Research Ethics Board, Office of Research Services, Fleming Hall – Room 301, Kingston, Ontario</p> <p>Brandon Regional Health Authority Ethics Committee, Brandon Regional Health Center, 150 McTavish Avenue East, Brandon, Manitoba</p>                                                                                                                                                                                                                                                                                                                                                            |

| Country | Institutional Review Board/Ethics Committee                                                                                                                                                                                                                                                                                                                                                                                                                                                                                                                                                                                                                                                                                                                                                                                                                                                                                                                                                                                                                                                                                                                                                                                                                                                                                                                                                                                                                                                                                                                                                                                                                                                  |
|---------|----------------------------------------------------------------------------------------------------------------------------------------------------------------------------------------------------------------------------------------------------------------------------------------------------------------------------------------------------------------------------------------------------------------------------------------------------------------------------------------------------------------------------------------------------------------------------------------------------------------------------------------------------------------------------------------------------------------------------------------------------------------------------------------------------------------------------------------------------------------------------------------------------------------------------------------------------------------------------------------------------------------------------------------------------------------------------------------------------------------------------------------------------------------------------------------------------------------------------------------------------------------------------------------------------------------------------------------------------------------------------------------------------------------------------------------------------------------------------------------------------------------------------------------------------------------------------------------------------------------------------------------------------------------------------------------------|
| Chile   | <p>Comite de Etica-Cientifico Servicio de Salud Araucania Sur, General Mackenna 51, Temuco</p> <p>Comite de Etica-Cientifica - Servicio de Salud Metropolitano Oriente, Av Salvador 364, Providencia, Santiago</p> <p>Comite de Etica de la Investigacion, Organismo asesor de Direccion Del Servicio de Salud Metropolitano Norte, CEI-SSMN, Maruri 272, Santiago</p> <p>Comite Etica, Clinica Davila, Recoleta 464, Santiago</p>                                                                                                                                                                                                                                                                                                                                                                                                                                                                                                                                                                                                                                                                                                                                                                                                                                                                                                                                                                                                                                                                                                                                                                                                                                                           |
| China   | <p>Ethics Committee of the First Affiliated Hospital, Sun Yat-Sen University, 58 Zhongshan Road 2, Guangzhou 510080, Guangdong Province</p> <p>Ethics Committee of Beijing Anzhen Hospital of the capital university of medical sciences, An Zhen Li, An Ding Men Wai, Chao Yang District, Beijing</p> <p>Ethics Committee of The Second Affiliated Hospital of Medical College, Zhejiang University, 88 Jiefang Road, Hangzhou 310009, Zhejiang Province</p> <p>Ethics Committee of The First Affiliated Hospital of People's Liberation Army General Hospital, No. 51 Fucheng Road, Hai Dian District, Beijing</p> <p>Ethics Committee of Nanjing General Hospital of Nanjing Military Command, 305 East Zhongshan Road, Nanjing 210002, Jiangsu Province</p> <p>Ethics Committee of The First Affiliated Hospital of Medical College, Zhejiang University, 79 Qingchun Road, Hangzhou 310003, Zhejiang Province</p> <p>Ethics Committee of The Third Affiliated Hospital of Sun Yat-Sen University, Gang Ding, Shi Pai, Guangzhou, 510060, Guangdong Province</p> <p>Ethics Committee of The First Affiliated Hospital of Nanjing Medical University, 300 Guangzhou Road, Nanjing 210029, Jiangsu Province</p> <p>Ethics Committee of The Second Hospital of Tianjin Medical University, No.23 Ping Jiang Dao, He Xi District, Tianjin, 30021 1</p> <p>E. C. Shanghai Jiao Tong University Affiliated First People's Hospital, 85 Wujin Road, Shanghai</p> <p>Ethics Committee of Nanjing Drum Tower Hospital, 58 Zhongshan Road 2, Guangzhou 510080, Guangdong Province</p> <p>Ethics Committee of Nanjing Drum Tower Hospital, 321 Zhongshan Road, Nanjing 210008, Jiangsu Province</p> |

| Country | Institutional Review Board/Ethics Committee                                                                                                                                                                                                                                                                                                                                                                                                                                                                                                                                                                                                                                                                                                                                                                                                                                                                                                                                                                                                                                                                                                                                                                                                                                                                                                                                           |
|---------|---------------------------------------------------------------------------------------------------------------------------------------------------------------------------------------------------------------------------------------------------------------------------------------------------------------------------------------------------------------------------------------------------------------------------------------------------------------------------------------------------------------------------------------------------------------------------------------------------------------------------------------------------------------------------------------------------------------------------------------------------------------------------------------------------------------------------------------------------------------------------------------------------------------------------------------------------------------------------------------------------------------------------------------------------------------------------------------------------------------------------------------------------------------------------------------------------------------------------------------------------------------------------------------------------------------------------------------------------------------------------------------|
|         | <p>IRB of West China Hospital, 37# Guo Xue Xiang, Chengdu, Sichuan</p> <p>The Ethics Committee of The Third Xiang Ya Hospital, He Xitong Zi Po Road, Chang Sha City</p> <p>Ethics Committee of Zhongshan Hospital, Fudan University, No.180 Feng Lin Road, Xu Hui District, Shanghai</p> <p>The Ethics Committee of Tong Ji Hospital of Tong Ji Medical College of Hua Zhong University of Science &amp; Technology, No.1095 Jie Fang Road, Wu Han City</p> <p>Ethics Committee of Shanghai Changhai Hospital, No.174 Changhai Road, Shanghai</p> <p>The IRB of Hainan Provincial People’s Hospital, Xiuhua Road 19, Xiuying District, Haikou</p> <p>Ethics Committee of Sir Run Run Shaw Hospital, No. 3 Qing Chun Road East, Hangzhou, Zhejiang Province</p> <p>The First Affiliated Hospital of China Medical University, No.155 Nanjing Bei Road, Heping Area, Shenyang, Liaoning</p> <p>IRB of The First Affiliated Hospital of Peking University, No. 8, Xi Shen Ku Road, Xi Cheng Area, Beijing</p> <p>Ethics Committee of General Hospital of Shenyang Military Region, No. 83 Wen Hua Road, Shen He District, Shenyang</p> <p>Ethics Committee of Xijing Hospital of The 4<sup>th</sup> Military Medical University, No. 15, Chang Le Xi Road, Xian</p> <p>Peking Union Medical College Hospital Ethics Committee, No. 1 Shuaifuyuan Wangfujing, Dongcheng Area, Beijing</p> |
| Croatia | <p>Drug Committee of Clinical Hospital Centre Zagreb, Kispaticeva 12, 10000 Zagreb</p> <p>Central Ethics Committee of Republic of Croatia, Ksaver 200a, 10000 Zagreb</p> <p>Ministry of Health and Social Welfare of Republic of Croatia, Ksaver 200a, 10000 Zagreb</p> <p>Local Ethics Committee of University Hospital for Infectious Diseases “Dr. Fran Mihaljevic”, Mirogojska 8, 10000 Zagreb</p> <p>Drug Committee of University Hospital for Infectious Diseases “Dr. Fran Mihaljevic”, Mirogojska 8, 10000 Zagreb</p>                                                                                                                                                                                                                                                                                                                                                                                                                                                                                                                                                                                                                                                                                                                                                                                                                                                         |

| Country        | Institutional Review Board/Ethics Committee                                                                                                                                                                                                                                                                                                                                                                                                                                                                                                                                                                                                                                                                     |
|----------------|-----------------------------------------------------------------------------------------------------------------------------------------------------------------------------------------------------------------------------------------------------------------------------------------------------------------------------------------------------------------------------------------------------------------------------------------------------------------------------------------------------------------------------------------------------------------------------------------------------------------------------------------------------------------------------------------------------------------|
| Czech Republic | <p>Multicentric Ethics Committee at the Teaching Hospital Praha Motol, V uvalu 84, 150 06 Praha 5</p> <p>Ethics Committee at the Hospital Vitkovice, Zaluzanskeho 1192/15, 703 84 Ostrava-Vitkovice</p> <p>Multicentric Ethics Committee at the Teaching Hospital Praha Motol, V uvalu 84, 150 06, Praha 5</p> <p>Ethics Committee at the Regional Hospital Tabor, Trida Kapitana Jarose 2000, 390 03 Tabor</p> <p>Ethics Committee at the Teaching Hospital Hradec Kralove, Sokolska 581, 500 05, Hradec Kralove 5</p>                                                                                                                                                                                         |
| Estonia        | Tallinn Medical Research Ethics Committee/National Institute for Health Development, Hiiu 42, Tallinn                                                                                                                                                                                                                                                                                                                                                                                                                                                                                                                                                                                                           |
| France         | C.C.P.P.R.B. – Paris-Broussais-HEGP, 96, rue Didot, 75014 Paris                                                                                                                                                                                                                                                                                                                                                                                                                                                                                                                                                                                                                                                 |
| Georgia        | <p>Local Ethics Committee of Ltd I. Javakhishvili Tbilisi State University Clinic, 60, D Agmashenebeli Ave, Tbilisi</p> <p>Local Ethics Committee of Tbilisi State Medical University of Institute of Postgraduate Medical Education and Continuous Professional Development, 29, Chavchavadze Ave., Tbilisi</p> <p>Local Ethics Committee of Legal Entity of Public Low “N. Kipshidze Central Clinical Hospital” of Tbilisi State Medical University, 29 Vaja Pshavela Ave., Tbilisi</p> <p>Local Ethics Committee of Union Clinical City-First Hospital, 9 Tsinandali Street, Tbilisi</p> <p>Local Ethics Committee of JSC Academic O. Gudushauri National Medical Centre, 18/20 Lubliana Street, Tbilisi</p> |
| Germany        | <p>Landesamt fur Gesundheit und Soziales Geschäftsstelle der Ethikkommission des Landes Berlin, Sachsische Str. 28, D-10707 Berlin</p> <p>Ehtik-Kommission der Medizinischen Hochschule Hannover, Carl-Neuberg-Str. 1, D-30625 Hannover</p> <p>Arztekammer Mecklenburg-Vorpommern Ethikkommission, August-Bebel-Str. 9A, 18055 Rostock</p>                                                                                                                                                                                                                                                                                                                                                                      |

| Country | Institutional Review Board/Ethics Committee                                                                                                                                                                                                                                                                                                                                                                                                                                                                                                                                                                                 |
|---------|-----------------------------------------------------------------------------------------------------------------------------------------------------------------------------------------------------------------------------------------------------------------------------------------------------------------------------------------------------------------------------------------------------------------------------------------------------------------------------------------------------------------------------------------------------------------------------------------------------------------------------|
| Greece  | <p>Scientific Council, University Hospital of Patra, Red Cross General Hospital of Athens, 1 Erithrou Stavrou and Athanasaki Street, Athens</p> <p>Administrative Board "Tzaneion" General Hospital of Piraeus, Afentouli 1 and Tzanni Street, Pireaus</p> <p>Scientific Council, General Hospital of Chest Diseases "Sotiria", 152 Mesogion Avenue, Athens</p> <p>"KAT: General Hospital, 2 Nikis Street, Kifissia 14561, Athens</p> <p>Scientific Committee, 251 Airforce General Hospital, 3 P. Kanellopoulou Street, Athens</p> <p>Scientific Council, General Hospital of Lamia, Terna Papasiopoulou Street, Lamia</p> |
| Israel  | <p>E. Wolfson Medical Center Helsinki Committee, E. Wolfson Medical Center, Holon</p> <p>Sheba Medical Center Helsinki Committee, Sheba Medical Center, Tel Hashomer</p> <p>Assaf Harofeh Medical Center Helsinki Committee, Assaf Harofeh Medical Center, Zerifin</p> <p>Barzilai Medical Center Helsinki Committee, Barzilai Medical Center, Ashkelon</p> <p>Kaplan Medical Center Helsinki Committee, Kaplan Medical Center, Rehovot</p> <p>Western Galilee Hospital Helsinki Committee, Western Galilee Hospital – Nahariya, Nahariya</p> <p>Rambam Medical Center Helsinki Committee, Rambam Medical Center, Haifa</p> |
| Korea   | <p>IRB of Korea University Guro Hospital, 80, Guro-dong, Guro-gu, Seoul</p> <p>IRB of Pusan National University Hospital, 10, Ami-dong 1-ga, Seo-gu, Busan</p> <p>IRB of Korea University Anam Hospital, 126-1, Anam-dong 5-ga, Seongbuk-gu, Seoul</p> <p>IRB of Yeungnam University Medical Center, 317-1 Daemyeong-dong, Nam-gu, Daegu</p> <p>IRB of Ajou University Hospital, San 5, Woncheon-dong, Yeongtong-gu Suwon-si, Gyeonggi-do</p>                                                                                                                                                                               |

| Country   | Institutional Review Board/Ethics Committee                                                                                                                                                                                                                                                                                                                                                                                                                                                                                                                                                                                                                                                                                                                   |
|-----------|---------------------------------------------------------------------------------------------------------------------------------------------------------------------------------------------------------------------------------------------------------------------------------------------------------------------------------------------------------------------------------------------------------------------------------------------------------------------------------------------------------------------------------------------------------------------------------------------------------------------------------------------------------------------------------------------------------------------------------------------------------------|
|           | <p>The Institutional Review Board, Ewha Womans University Mokdong Hospital, 911-1, Mok-dong, Yangcheon-gu, Seoul</p> <p>IRB of Kangnam St. Mary's Hospital, 505, Banpo-dong, Seocho-gu, Seoul</p> <p>IRB of Wonju Christian Hospital, 162, Ilsan-dong, Wonju, Kangwon-do</p> <p>The Institutional Review Board, Ulsan University Hospital, 290-3 Jeonha-dong, Dong-gu, Ulsan</p> <p>The Institutional Review Board, Gil Medical Center, Gachon Medical School, 1198 Kuwol-dong, Namdong-gu, Incheon</p> <p>The Institutional Review Board, Severance Hospital, Yonsei University College of Medicine, 134 Sinchon-dong, Seodaemun-gu, Seoul</p> <p>The Institutional Review Board, KyungHee University Medical Center, 1 Hoeki-dong, Dongdaemun-gu, Seoul</p> |
| Latvia    | <p>State Agency of Medicines Latvia, Riga, Jersikas 15</p> <p>Central Ethics Committee, 11 Novembra Krastmala 29, Riga LV-1050</p>                                                                                                                                                                                                                                                                                                                                                                                                                                                                                                                                                                                                                            |
| Lebanon   | <p>The Institutional Review Board, Faculty of Medicine, American University of Beirut, Riad El Solh, Beirut</p> <p>Medical Ethics Committee, St. George University Hospital, Achrafieh</p> <p>Ethics Committee, Hotel Dieu de France University Hospital, Alfred Naccache Ave, Achrafieh</p>                                                                                                                                                                                                                                                                                                                                                                                                                                                                  |
| Lithuania | <p>Lithuanian Bioethics Committee, Vilniaus str. 33-230, LT-1119 Vilnius</p> <p>State Medicine Control Agency, Traku str. 14, LT-01132 Vilnius</p>                                                                                                                                                                                                                                                                                                                                                                                                                                                                                                                                                                                                            |



| Country     | Institutional Review Board/Ethics Committee                                                                                                                                                                                                                                                                                                                                                                                                                                                                                                                                                                                                                                                                                                                                                                                                                                                                                                                                      |
|-------------|----------------------------------------------------------------------------------------------------------------------------------------------------------------------------------------------------------------------------------------------------------------------------------------------------------------------------------------------------------------------------------------------------------------------------------------------------------------------------------------------------------------------------------------------------------------------------------------------------------------------------------------------------------------------------------------------------------------------------------------------------------------------------------------------------------------------------------------------------------------------------------------------------------------------------------------------------------------------------------|
| Mexico      | <p>Comite de Etica del Hospital Central Dr. Ignacio Morones Prieto, Avenida Venustiano Carranza No. 2395, Zona Universitaria, 78240, San Luis Potosi,</p> <p>Comite de Etica del Hospital Civil “Fray Antonio Alcalde”, Calle Hospital No. 278 S.H., 44100, Guadalajara, Jalisco</p> <p>Comite de Etica del Hospital General Dr. Aurelio Valdivieso, Calzada Porfirio Diaz 400 Colonia Reforma 68050, Oaxaca</p> <p>Comite de Etica Hospital San Jose TEC de Monterrey, Morones Prieto #3000 Pte., Colonia Los Doctores, 64710, Monterrey, Neuvo Leon</p> <p>Comite de Etica del Hospital Central Universitario de Chihuahua, Rosales 3302, Colonia Obrera, 31350, Chihuahua</p> <p>Comite de Investigacion para Estudios es Humanos, Puente de Piedra # 150. Toriello Guerra, Tlalpan C.P. 14050</p> <p>Comite de Ensenanza, Investigacion, Capacitacion Etica y Admision del Centenario Hospital Miguel Hidalgo, Galeana Sur 465, Col Obraje, CP 20230 Aguascalientes Ags.</p> |
| Philippines | <p>Research Implementation Development Office, UP-Philippines General Hospital, Taft Avenue, Manila</p> <p>Research and Ethics Committee, Veterans Memorial Medical Center, North Avenue, Diliman, Quezon City</p> <p>Ethics Review Committee, Lung Center of the Philippines, Quezon Avenue, Quezon City, Manila</p> <p>Ethics Review Board, St. Luke’s Medical Center, E. Rodriguez Sr. Avenue, Quezon City</p> <p>Makati Medical Center - Institutional Review Board, Amorsolo Street, Legaspi Village, Makati City</p> <p>Research &amp; Ethics Committee, Manila Doctors Hospital, 667 United Nations Avenue, Manila</p> <p>Institutional Review Board, Quirino Memorial Medical Center, Katipunan Road Corner P. Tuazon Avenue, 1109 Quezon City</p>                                                                                                                                                                                                                       |

| <b>Country</b> | <b>Institutional Review Board/Ethics Committee</b>                                                                                                                                                                                                                                                                                                                                                                                                                                                                                                                                                      |
|----------------|---------------------------------------------------------------------------------------------------------------------------------------------------------------------------------------------------------------------------------------------------------------------------------------------------------------------------------------------------------------------------------------------------------------------------------------------------------------------------------------------------------------------------------------------------------------------------------------------------------|
| Poland         | <p>Komisja Bioetyczna Lubelskiej Isby Lekarskiej, ul. Chmielna 4, 20-079 Lublin</p> <p>Komisja Bioetyczna przy Centrum Medycznym Kształcenia Podyplomowego, ul. Marymoncka 99/103, Warszawa</p> <p>Uczelniana Komisja Etyki Badan Naukowych, Al. Kosciuszki 4, 80-419 Lodz</p> <p>Komisja Etyczna Nadzoru Nad Badaniami na Ludziach Centralnego Szpitalia Klinicznego MSWiA, ul. Woloska 137, 02-507 Warszawa</p> <p>Komisja Bioetyczna przy Okregowej Izbie Lekarskiej, ul.Krupnicza 11a, 31-123 Krakow</p> <p>Komisja Bioetyczna przy Okregowej Izbie Lekarskiej, ul.Krupnicza 11a, 31-123 Krakow</p> |
| Portugal       | Comissao de Etica para a Investigacao Clinica (CEIC), Parque de Saude de Lisboa – Avenida do Brasil, 53, 1749-004 Lisboa                                                                                                                                                                                                                                                                                                                                                                                                                                                                                |
| Romania        | National Ethics Committee, 48 Aviator Sanatescu St., Sector 1, 011478 Bucharest                                                                                                                                                                                                                                                                                                                                                                                                                                                                                                                         |

| Country | Institutional Review Board/Ethics Committee                                                                                                                                                                                                                                                                                                                                                                                                                                                                                                                                                                                                                                                                                                                                                                                                                                                                                                                                                                                                                                                                                                                                                                                                                                                                                                                                                                                                                                                                                                                                                                                                                                                                                                                                                                                                                                                                                                                                                                                                                                                                                                                                              |
|---------|------------------------------------------------------------------------------------------------------------------------------------------------------------------------------------------------------------------------------------------------------------------------------------------------------------------------------------------------------------------------------------------------------------------------------------------------------------------------------------------------------------------------------------------------------------------------------------------------------------------------------------------------------------------------------------------------------------------------------------------------------------------------------------------------------------------------------------------------------------------------------------------------------------------------------------------------------------------------------------------------------------------------------------------------------------------------------------------------------------------------------------------------------------------------------------------------------------------------------------------------------------------------------------------------------------------------------------------------------------------------------------------------------------------------------------------------------------------------------------------------------------------------------------------------------------------------------------------------------------------------------------------------------------------------------------------------------------------------------------------------------------------------------------------------------------------------------------------------------------------------------------------------------------------------------------------------------------------------------------------------------------------------------------------------------------------------------------------------------------------------------------------------------------------------------------------|
| Russia  | <p data-bbox="427 296 1317 365">Ethics Committee at the Federal Body of Medicines Quality Control, 8 Petrovsky Blvd., bld. 3, Moscow, 127051</p> <p data-bbox="427 390 1328 459">Local Ethics Committee of Municipal Health Care Institution Municipal Clinical Hospital #13 1/1, Velozavodskaya str., Moscow, 115280</p> <p data-bbox="427 485 1386 554">Ethics Committee at Roszdravnadzor, 4 Slavyanskaya Sq., bld. 1, 109074 Moscow</p> <p data-bbox="427 579 1344 682">Local Ethics Committee of Municipal Health Care Institution of Moscow Municipal Clinical Hospital #11 of Health Department of Moscow, 6 Dvintsev Street, 127018, Moscow</p> <p data-bbox="427 707 1386 852">Local Ethics Committee of the Central Clinical &amp; Diagnostics Federal State Institution "National Medicine &amp; Surgery Center named after N.I. Pirogov" under Federal Agency for Health Care &amp; Social Development, 70 Nizhnyaya Pervomayskaya, 105203 Moscow</p> <p data-bbox="427 877 1390 980">Local Ethics Committee of State Institution "Scientific Research Institute of Clinical &amp; Experimental Lymphology of RAMS, Siberian Branch, 2 Timakov str., 630117 Novosibirsk</p> <p data-bbox="427 1005 1338 1075">Local Ethics Committee of Municipal Health Care Institution "Municipal Clinical Hospital #2", 21 Polzunov str., Novosibirsk, 630051</p> <p data-bbox="427 1100 1370 1245">Local Ethics Committee of Federal State Institution Novosibirsk Scientific Research Institute of Blood Circulation Pathology named after academician E.N. Meshalkin, 15 Rechkunovskaya str., 630055 Novosibirsk</p> <p data-bbox="427 1270 1362 1339">Local Ethics Committee of the Saint-Petersburg State Medical Institution "Municipal Hospital #26", 2 Kostyushko str., Saint Petersburg 196247</p> <p data-bbox="427 1365 1349 1470">Local Ethics Committee of Municipal Health Care Institution Clinical Hospital of Emergency Care named after N.V. Solovyev, 11 Zagorodny Sad str., 150003, Yaroslavi</p> <p data-bbox="427 1495 1284 1564">Local Ethics Committee of the State Medical Institution of Moscow "Clinical Hospital #7", 4 Kolomensky proezd, Moscow 115446</p> |

| Country      | Institutional Review Board/Ethics Committee                                                                                                                                                                                                                                                                                                                                                                                                                                                                                                                             |
|--------------|-------------------------------------------------------------------------------------------------------------------------------------------------------------------------------------------------------------------------------------------------------------------------------------------------------------------------------------------------------------------------------------------------------------------------------------------------------------------------------------------------------------------------------------------------------------------------|
| Serbia       | <p>Medicines and Medical Devices Agency of Serbia, Vojvode Stepe 458, 11152 Belgrade</p> <p>Ethics Committee, Clinic for Pulmonary Diseases and TBC “Knez Selo”, ZP 18204 Gornji Metejevac, 18 000 Nis</p> <p>Ethics Committee, Clinical Center Kragujevac, Zmaj Jovina 30, 34 000 Kragujevac</p> <p>Medicines and Medical Devices Agency of Serbia, Vojvode Stepe 458, 11152 Belgrade</p> <p>Ethics Committee, Clinical Center Serbia, Pasterova 2, 11000 Belgrade</p> <p>Ethics Committee, Clinical Hospital Center “Bezanijska Kosa”, Autoput BB, 11070 Belgrade</p> |
| Slovakia     | <p>Eticka komisia, Slovensky ustav srdcovych a cievnych chorob, Pod Krasnou horkou 1, 833 46 Bratislava</p> <p>Eticka komisia, Specializovana nemocnica sv. Svorada ZOBOR, n.o., Klastorska 134, 949 88 NITRA-ZOBOR</p> <p>Ethics Committee of Teaching Hospital Nitra, Spitalska 56, 950 01 Nitra</p> <p>Multicentre Ethics Committee, Teaching Hospital &amp; Policlinic of akad. L. Derer's, Limbova 5, 833 05 Bratislava</p>                                                                                                                                        |
| Slovenia     | <p>The National Medical Ethics Committee, University Medical Centre Ljubjana, Zaloska 7, 1525 Ljubljana</p>                                                                                                                                                                                                                                                                                                                                                                                                                                                             |
| South Africa | <p>South African Medical Association Research Ethics Committee, Block F Castle Walk, Corporate Park, Nossob Street, Erasmuskloof Ext 3, Pretoria 0153</p> <p>Faculty of Health Sciences Research Ethics Committee, University of Pretoria, Soutpansberg Road, MRC – Building, Room 2-19, Pretoria, Gauteng</p>                                                                                                                                                                                                                                                          |

| Country  | Institutional Review Board/Ethics Committee                                                                                                                                                                                                                                                                                                                                                                                                                                                                                                                                                                                                                                                                                                                                                                                                                                                                                                                                                                                                                                                                                                                                                                                                                         |
|----------|---------------------------------------------------------------------------------------------------------------------------------------------------------------------------------------------------------------------------------------------------------------------------------------------------------------------------------------------------------------------------------------------------------------------------------------------------------------------------------------------------------------------------------------------------------------------------------------------------------------------------------------------------------------------------------------------------------------------------------------------------------------------------------------------------------------------------------------------------------------------------------------------------------------------------------------------------------------------------------------------------------------------------------------------------------------------------------------------------------------------------------------------------------------------------------------------------------------------------------------------------------------------|
| Spain    | <p>Comite Etico Regional de la Comunidad de Madrid, Unidad de Bioetica, P Recoletos, 14-7 planta, 28001 Madrid</p> <p>Comite Etico de Investigacion Clinica, Hospital General Universitario de Valencia, Avda. Tres Cruces, s/n, 46014 Valencia</p> <p>Comite Etico de Investigacion Clinica, Hospital Ramon y Cajal, Ctra. De Colmenar, Km 9,1, 28034 Madrid</p> <p>Comite Etico Investigacion Clinica de Galicia (SERGAS), Division de Farmacia y Productos Sanitarios, Conselleria de Sanidade, c/ San Lazaro, s/n, 15703 Santiago de Compostela</p> <p>Comite Etico de Investigacion Clinica, Fundacion Jimenez Diaz, Avda. Reyes Catolicos, 2, 28040 Madrid</p> <p>Comite Etico Investigacion Clinica, Fundacion Hospital Alcorcon, c/Budapest, s/n 28922 Alcorcon (Madrid)</p> <p>Comite Etico de Investigacion, Clinica de Aragon, Avda. Gomez Laguna, 25; planta 3, 50009 Zaragoza</p> <p>Comite Etico de Investigacion Clinica, Hospital Universitario de Salamanca, Paseo de San Vicente, 182, 37007 Salamanca</p> <p>Comite Etico de Investigacion Clinica, Hospital General Universitario Gregorio Maranon, C/ Dr. Esquerdo, 46, 28007 Madrid</p> <p>Ethic Committee of Clinical Research Regional de Madrid, C/ Aduana, 29 3º Planta, 28013 Madrid</p> |
| Thailand | <p>Ethics Committee, Faculty of Medicine Siriraj Hospital, Mahidol University, 2 Prannok Road, Bangkoknoi, Bangkok</p> <p>The Khon Kaen University Ethics Committee for Human Research, 123 Mitraphab Road, Dean office 6<sup>th</sup> Floor, Faculty of Medicine, Khon Kaen University, 123 Mitraphab Road, Muang, Khon Kaen</p> <p>The Ethical Review Committee for Research in Human Subjects, Ministry of Public Health, Tiwanon Road, Muang, Nonthaburi</p> <p>Research Ethics Committee, Faculty of Medicine, Chiang Mai University, 110 Intavaroros Road, Muang, Chiang Mai</p> <p>Institutional Review Board of Bamrasnaradura Infectious Diseases Institute, 126 Tiwanon Road, Nothaburi</p>                                                                                                                                                                                                                                                                                                                                                                                                                                                                                                                                                               |

| Country | Institutional Review Board/Ethics Committee                                                                                                                                                                                                                                                                                                                                                                                                                                                                                                                                                                                                                                                                                                                                                                                                                                                                                                                                                                                                                                                                                                                                                                                                                                                                                                                                                                                                                                                                                                                                                                                                                                                                         |
|---------|---------------------------------------------------------------------------------------------------------------------------------------------------------------------------------------------------------------------------------------------------------------------------------------------------------------------------------------------------------------------------------------------------------------------------------------------------------------------------------------------------------------------------------------------------------------------------------------------------------------------------------------------------------------------------------------------------------------------------------------------------------------------------------------------------------------------------------------------------------------------------------------------------------------------------------------------------------------------------------------------------------------------------------------------------------------------------------------------------------------------------------------------------------------------------------------------------------------------------------------------------------------------------------------------------------------------------------------------------------------------------------------------------------------------------------------------------------------------------------------------------------------------------------------------------------------------------------------------------------------------------------------------------------------------------------------------------------------------|
| Ukraine | <p>Ethics Committee of State Pharmacological Centre of Ministry of Health of Ukraine, 7 Grushevsky str., 01021, Kyiv</p> <p>Central Ethics Committee of Health Ministry of Ukraine, 5 Narodnogo Opolchennya str., Kyiv, 03680</p>                                                                                                                                                                                                                                                                                                                                                                                                                                                                                                                                                                                                                                                                                                                                                                                                                                                                                                                                                                                                                                                                                                                                                                                                                                                                                                                                                                                                                                                                                   |
| USA     | <p>Human Studies Subcommittee, Syracuse VA Medical Center, 800 Irving Ave., Syracuse, NY</p> <p>WIRB, 3535 Seventh Avenue SW, Olympia, WA 98502-5010</p> <p>Office of Research Affairs, Rush University Medical Center, 1750 West Congress Parkway, PB II Suite 439, Chicago, IL</p> <p>The Institutional Review Board, Cheryl C. Byers, Director, Wake Forest University Health Sciences, Medical Center Boulevard, Winston-Salem, NC</p> <p>Institutional Review Board, The University of Texas Health Center at Tyler, 11937 US HWY 271, Tyler, TX</p> <p>Colorado Multiple Institutional Review Board (COMIRB), 120101 E.Colfax Avenue Rm #2353, Campus Box F-490, Aurora, CO</p> <p>Duke University Health System IRB, 2400 Pratt Street, 9<sup>th</sup> Floor, Box 2991, Durham, NC 27705</p> <p>Trident Medical Center, 9330 Medical Plaza Drive, Charleston, SC 29406</p> <p>Guthrie Healthcare System Institutional Review Board, One Guthrie Square, Sayre, PA</p> <p>Biomedical Research Alliance of New York, LLC, Institutional Review Board, 225 Community Drive, Suite 100, Great Neck, NY</p> <p>Phelps County Regional Medical Center – IRB, 1000 West Tenth Street, Rolla, MO</p> <p>Sun Health Institutional Review Board, 10515 W. Santa Fe Drive, Sun City, AZ</p> <p>Joint IRB of St. Rita’s Medical Center and SCCI, 730 W. Market Street, Lima, OH</p> <p>IRB of Lima Memorial Hospital, 1001 Bellefontaine Avenue, Lima, OH</p> <p>University of Florida, Health Center Institutional Review Board, P.O. Box 100173, Gainesville, FL</p> <p>Temple University Institutional Review Board, Temple University Health Sciences Center, 3400 North Broad Street (509-00), Philadelphia, PA</p> |

| Country | Institutional Review Board/Ethics Committee                                                                                                                                                                                                                                                                                                                                                                                                                                                                                                                                                                                                                                                                                                                                                                                                                                                                                                                                                                                                                                                                                                                                                                                                                                                                                                                                                                                                                                                                                                                                                                                                                                                                                                                                                                                                               |
|---------|-----------------------------------------------------------------------------------------------------------------------------------------------------------------------------------------------------------------------------------------------------------------------------------------------------------------------------------------------------------------------------------------------------------------------------------------------------------------------------------------------------------------------------------------------------------------------------------------------------------------------------------------------------------------------------------------------------------------------------------------------------------------------------------------------------------------------------------------------------------------------------------------------------------------------------------------------------------------------------------------------------------------------------------------------------------------------------------------------------------------------------------------------------------------------------------------------------------------------------------------------------------------------------------------------------------------------------------------------------------------------------------------------------------------------------------------------------------------------------------------------------------------------------------------------------------------------------------------------------------------------------------------------------------------------------------------------------------------------------------------------------------------------------------------------------------------------------------------------------------|
|         | <p>DeKalb Medical Center IRB, 2701 North Decatur Road, Decatur, Georgia</p> <p>Office of Research Administration, University of California, Irvine, 300 University Tower, Irvine, CA</p> <p>Fox Commercial Institutional Review Board, 326 North Seventh Street, Ste. 218, Springfield, IL</p> <p>Our Lady of Resurrection Medical Center Institutional Review Board, 5645 West Addison Street, Chicago, IL</p> <p>Durham VAMC, 508 Fulton Street, Durham, NC</p> <p>Monmouth Medical Center IRB, Department of Medical Affairs, 300 Second Avenue</p> <p>Stanley 223, Long Branch, NJ</p> <p>SRMC Institutional Review Board, 101 East Wood Street, Spartanburg, SC</p> <p>Research Services, Nebraska-Western Iowa Health Care System, 4101 Woolworth Avenue (111D), Omaha, NE</p> <p>Akron General Medical Center, Institutional Review Board, 400 Wabash Avenue, Akron, OH</p> <p>Wuesthoff Health Systems, 110 Longwood Avenue, MS #4, Rockledge, FL</p> <p>Joint Investigation Review Board, 500 West Broadway, Missoula, MT</p> <p>Committee for the Use of Human Subjects in Research, Memorial Hospital of Rhode Island, 111 Brewster Street, Pawtucket, RI</p> <p>Institutional Review Board, Edward Hospital &amp; Health Services, 801 South Washington Street, Naperville, IL</p> <p>Henry Ford Hospital, Institutional Review Board, 2799 W. Grand Blvd., Detroit, MI</p> <p>Health Sciences Institutional Review Board, University at Buffalo, 150 Parker Hall, Buffalo, NY</p> <p>Maricopa Integrated Health System, Institutional Review Board, 2601 E. Roosevelt Street, Phoenix, AZ</p> <p>Genesys Regional Medical Center Institutional Review Board, One Genesys Parkway, Grand Blanc, MI</p> <p>Appalachian Regional Healthcare, Inc., Institutional Review Board, System Center – Hazard, 100 Airport Gardens Road, Hazard, KY</p> |

| <b>Country</b> | <b>Institutional Review Board/Ethics Committee</b>                                                                                                                                                                                                                                                                                                                            |
|----------------|-------------------------------------------------------------------------------------------------------------------------------------------------------------------------------------------------------------------------------------------------------------------------------------------------------------------------------------------------------------------------------|
|                | <p>The Methodist Hospital Research Institute, Institutional Review Board,<br/>6565 Fannin Street, STB1-14, Houston, TX</p> <p>University at Buffalo, The State University of New York Health Sciences<br/>Institutional Review Board, 150 Parker Hall, Buffalo, NY</p> <p>St. Anthony Hospitals Institutional Review Board, 4231 W.16<sup>th</sup> Avenue,<br/>Denver, CO</p> |
